# Supplementary material for: High energy density hybrid supercapacitor based on cobalt-doped nickel sulfide flower-like hierarchitectures deposited with nitrogen-doped carbon dots
Source: Royal Society of Chemistry journal article supplement (doi:10.1039/d0nr07851d), 2020-12-18
Supplement: d0nr07851d1.pdf [file d0nr07851d1.pdf]

Electronic Supplementary Information (ESI) for

**High energy density hybrid supercapacitor based on  
cobalt-doped nickel sulfide flower-like  
hierarchitectures deposited with nitrogen-doped  
carbon dots**

Zhenyuan Ji,<sup>a\*</sup> Kai Liu,<sup>a</sup> Wenyao Dai,<sup>a</sup> Dongwei Ma,<sup>a</sup>

Hongyan Zhang,<sup>a</sup> Xiaoping Shen,<sup>a\*</sup> Guoxing Zhu<sup>a</sup> and Shikui Wu<sup>b</sup>

<sup>a</sup> *School of Chemistry and Chemical Engineering, Jiangsu University, Zhenjiang  
212013, P. R. China*

<sup>b</sup> *College of Pharmacy, Inner Mongolia Medical University, Hohhot 010059, P. R.  
China*

\* Corresponding author.

*E-mail address:* jizhenyuan@ujs.edu.cn (Z.Y. Ji), shenxp@ujs.edu.cn (X.P. Shen)

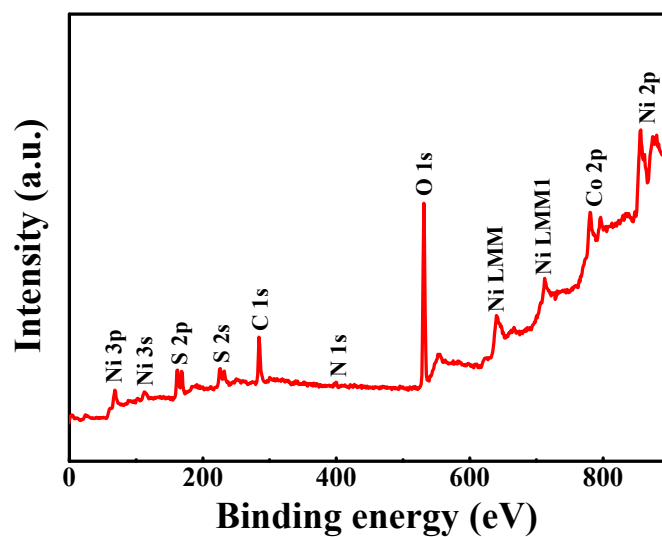

**Fig. S1.** XPS survey spectrum of Co-NiS/NCDs-2 flower-like hierarchitectures.

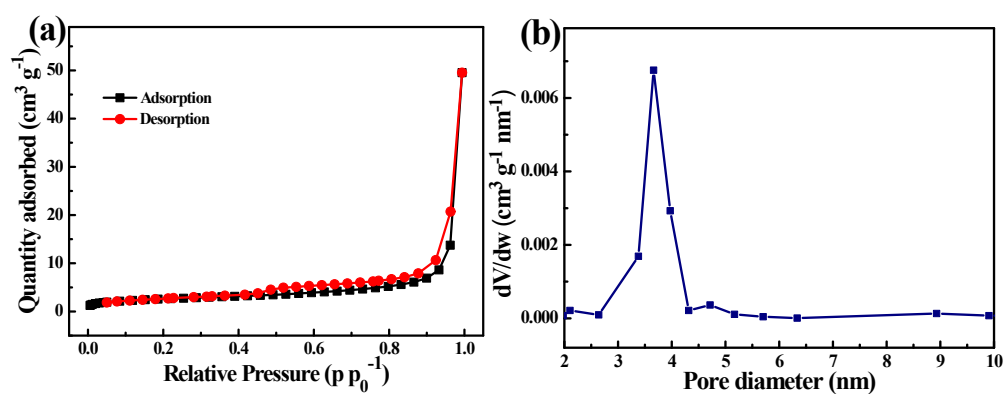

**Fig. S2.** (a) The nitrogen adsorption/desorption isotherm and (b) pore size distribution of Co-NiS/NCDs-2 flower-like hierarchitectures.

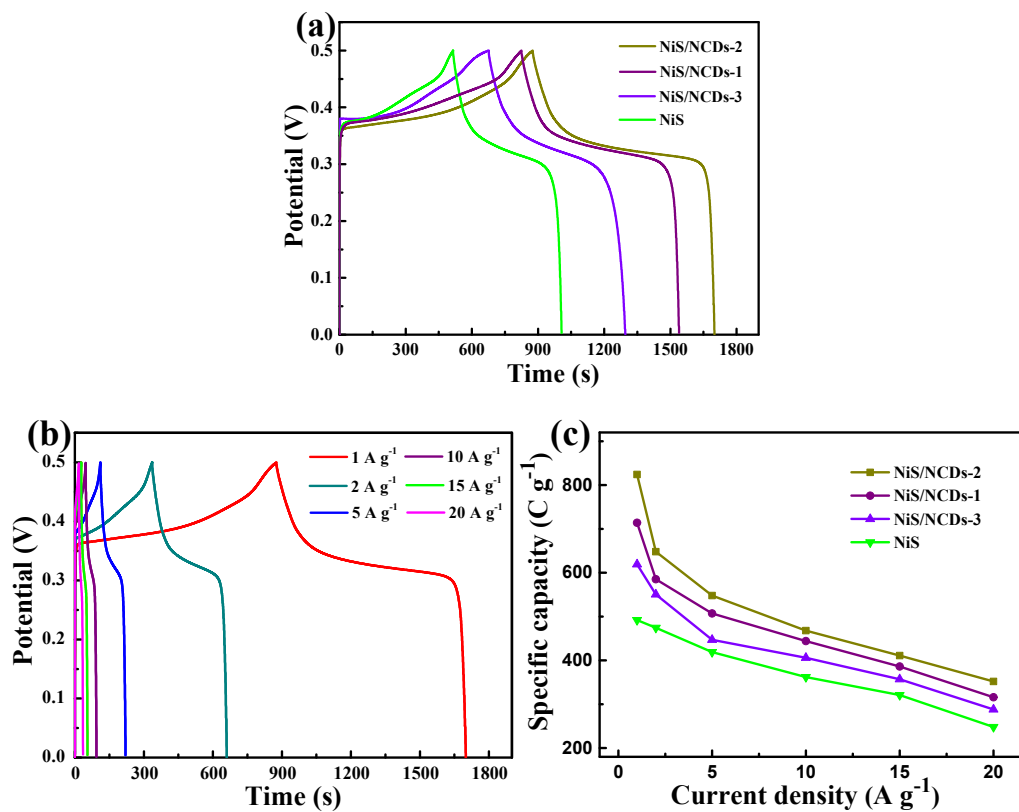

**Fig. S3.** (a) GCD profiles of NiS and various NiS/NCDs composites at 1 A g<sup>-1</sup>; (b) GCD profiles of NiS/NCDs-2 composites at 1-20 A g<sup>-1</sup>; (c) The specific capacities of NiS and various NiS/NCDs composites at 1-20 A g<sup>-1</sup>.

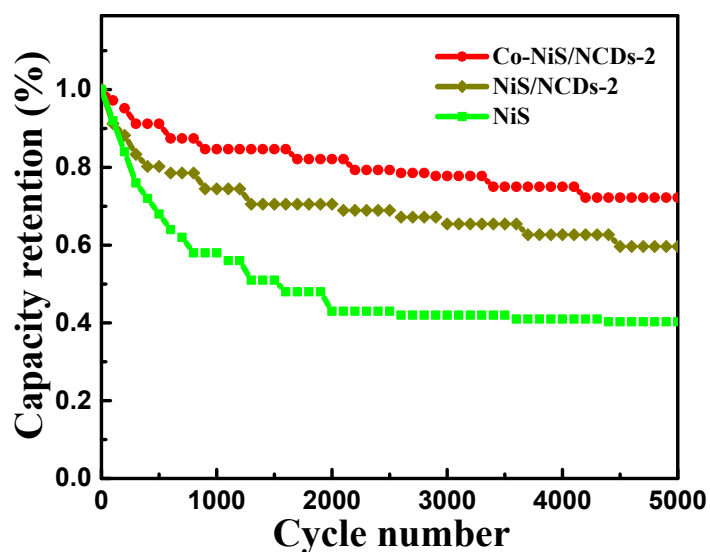

**Fig. S4.** The cyclic properties of NiS, NiS/NCDs-2 and Co-NiS/NCDs-2 flower-like hierarchitectures at 10 A g<sup>-1</sup>.

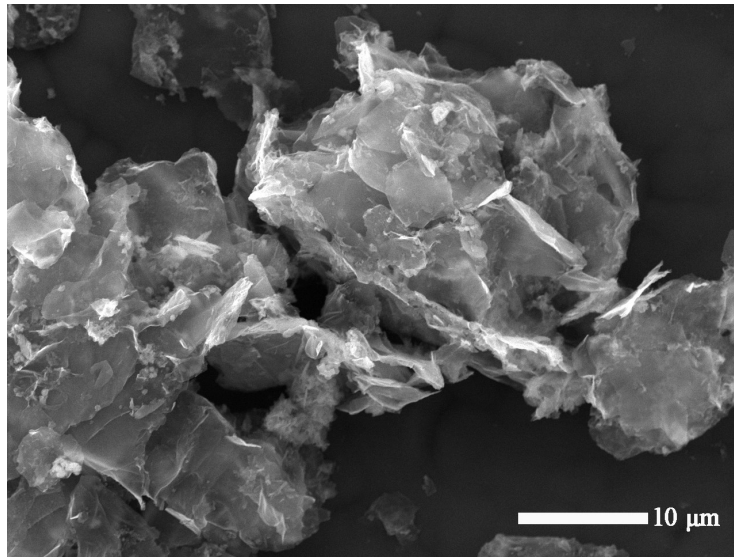

**Fig. S5.** SEM image of PPD/rGO composites.

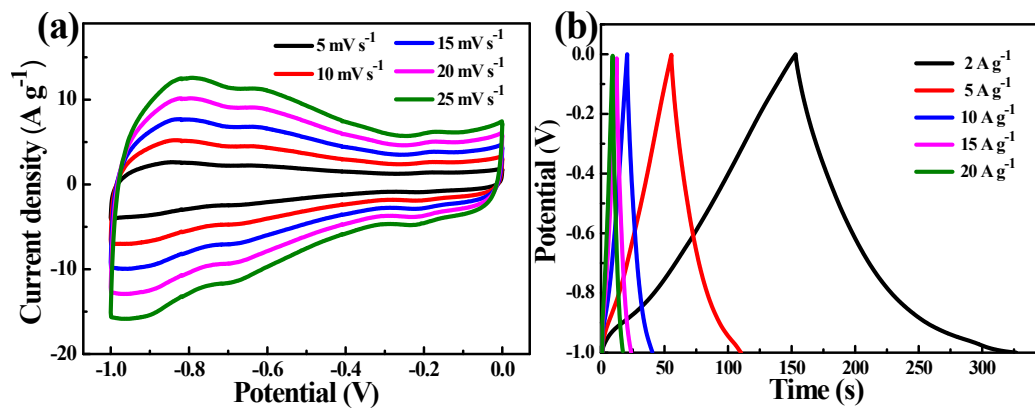

**Fig. S6.** (a) CV curves of PPD/rGO composites at 5-25 mV s<sup>-1</sup>; (b) GCD curves of PPD/rGO composites at 2-20 A g<sup>-1</sup>.
